# Supplementary material for: Luminescent AuNPs@Tb/adenosine monophosphate nanostructures for 2,6-pyridinedicarboxylic acid detection
Source: Royal Society of Chemistry journal article supplement (doi:10.1039/c6ay00073h), 2016-01-01
Supplement: c6ay00073h1.pdf [file c6ay00073h1.pdf]

Supporting information

**Luminescent AuNPs@Tb/Adenosine Monophosphate  
Nanostructures for 2, 6-Pyridinedicarboxylic Acid Detection**

Mulan Zeng, Fenfen Liu, Dongqin Hu, Juan Hao, Ping Li, Li Wang, Zhenzhong Huang\* and

Yonghai Song\*

*Key Laboratory of Functional Small Organic Molecule, Ministry of Education, Key Laboratory of Chemical Bio*

---

\*Corresponding author: Tel/Fax: +8679188120861. E-mail: [yhsonggroup@hotmail.com](mailto:yhsonggroup@hotmail.com) (Y. Song).

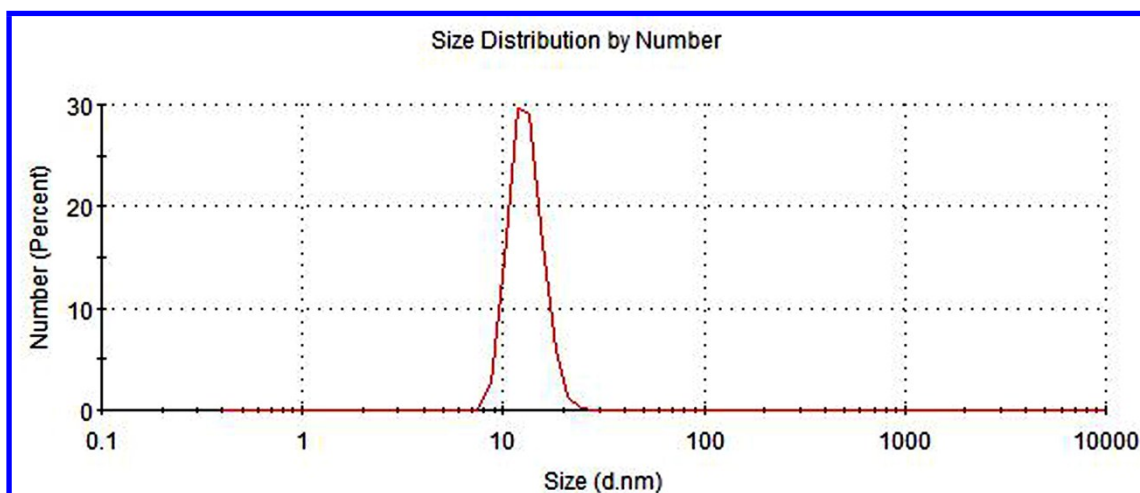

**Fig. S1.** Size distribution of AuNPs measured by DLS.

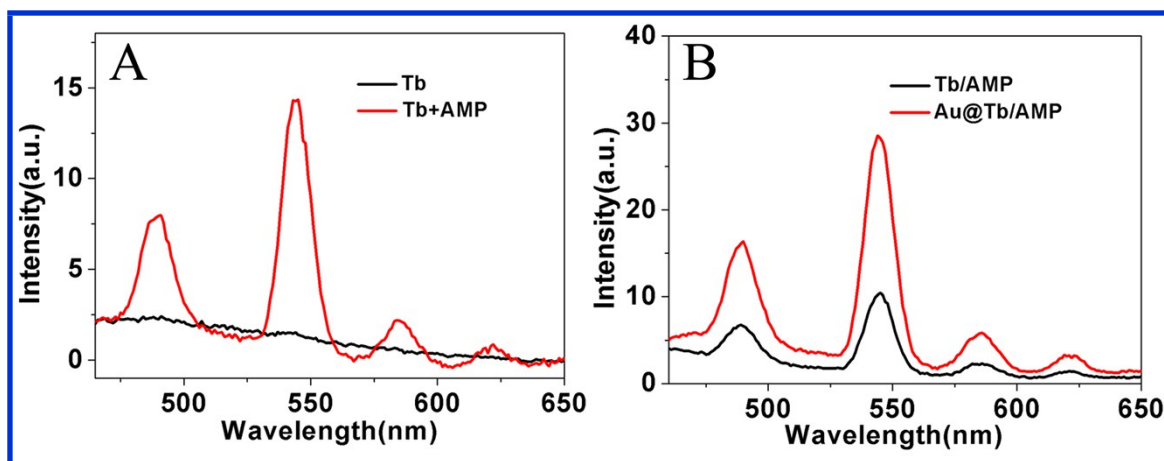

**Fig. S2.** (A) Emission spectra of  $Tb^{3+}$  and Tb/AMP NCPs. (B) Emission spectra of 0.15 mg/mL Tb/AMP NCPs and 0.15 mg/mL AuNPs@Tb/AMP NCPs.

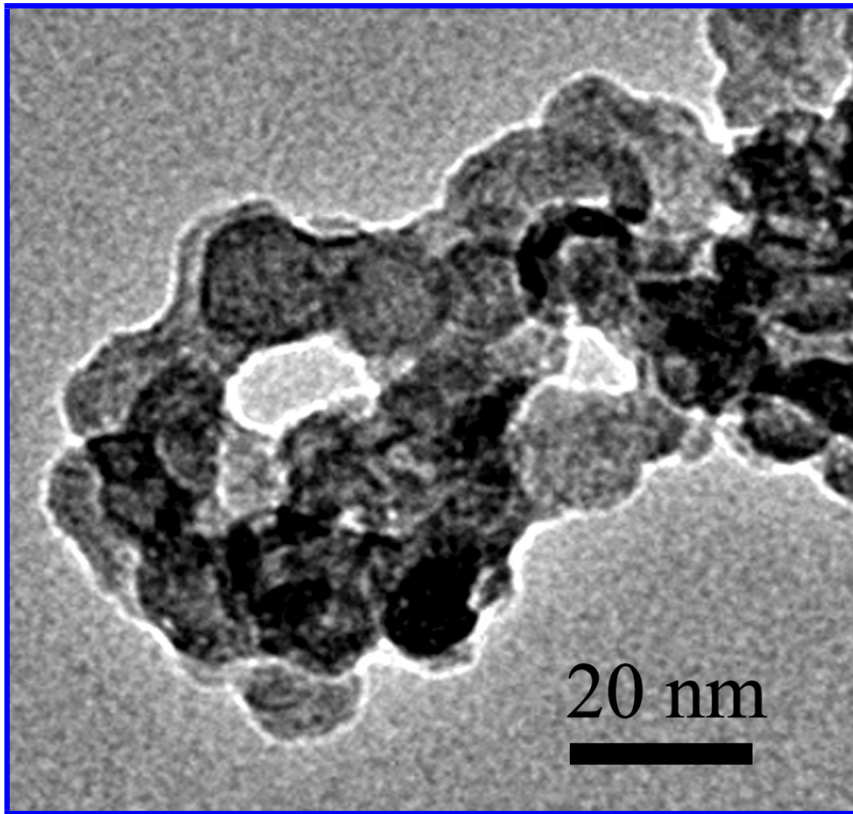

**Fig. S3.** TEM image of AuNPs@Tb/AMP NCPs/DPA.
